# Supplementary material for: The Surprising Effect of Phenformin on Cutaneous Darkening and Characterization of Its Underlying Mechanism by a Forward Chemical Genetics Approach
Source: PubMed Central journal article supplement (PMC7073119; doi:10.3390/ijms21041451), 2020-02-20

## **Supplementary materials**

### **Title**

**The surprising effect of phenformin on cutaneous darkening and characterization of its underlying mechanism by a forward chemical genetics approach**

### **Journal**

*International Journal of Molecular Sciences*

### **Authors**

Kei Takano, Akira Hachiya, Daiki Murase, Akiko Kawasaki, Hirokazu Uda, Shinya Kasamatsu, Yoshiya Sugai, Yoshito Takahashi, Tadashi Hase, Atsushi Ohuchi and Tamio Suzuki

**\*Corresponding author:** Dr. Akira Hachiya, Planning and Implementation, Kao Corporation, Haga, Tochigi, 321-3497, JAPAN

Phone: +1-513-455-5532. E-mail: hachiya.akira@kao.com

## **Supplemental Figure Legends**

### **Supplemental Figure 1. Phenformin darkens skin samples from a Hispanic donor and a Caucasian donor in tissue culture.**

(a) Skin tissues obtained from a Hispanic subject (48y) were subjected to tissue culture with or without 300  $\mu$ M phenformin for 8 days. The photographs shown are representative samples. Scale bars = 5 mm. (b) Treated skins were subjected to Fontana-Masson staining. Scale bars = 100  $\mu$ m. The areas indicated by the squares are shown at higher magnification under each image. (c) Skin tissues obtained from a Caucasian subject (18y) were subjected to tissue culture with or without 300  $\mu$ M phenformin for 6 days. The photographs shown are representative samples. Scale bars = 5 mm.

### **Supplemental Figure 2. Phenformin does not affect DOPA oxidase activity and the expression levels of melanogenesis-related proteins in melanocytes.**

(a) After treatment of NHEMs with or without phenformin for 3 days (at the indicated concentrations), DOPA oxidase activity was measured. Values represent means  $\pm$  SD of 6 independent samples ( $***P < 0.001$  versus control (DMSO treatment) by Dunnett's test). (b) Microscopic images of NHEMs treated with DMSO (control) or phenformin (300  $\mu$ M or 1 mM). (c) After incubation with or without phenformin for 4 days (at the indicated concentrations), NHEMs were lysed and subjected to western blot analysis of Tyrosinase and TRP1 proteins.  $\beta$ -Actin = internal control.

### **Supplemental Figure 3. Evaluation of the potential effects of biguanide compounds on the regulation of skin color.**

Skin tissues obtained from a Japanese subject (age unknown) were subjected to tissue culture with

or without (a) phenformin, (b) phenylbiguanide, (c) metformin, (d) buformin or (e) N-[amino(imino)methyl]piperidine-1-carboximidamide for 7 days. The photographs shown are representative samples. Scale bars = 5 mm.

**Supplemental Figure 4. SAR (structure-activity relationship) analysis of biguanide compounds to evaluate their potential skin darkening effects.**

Chemical structures of (a) a skin darkening compound (phenformin), and (b) non-skin darkening compounds (phenylbiguanide, metformin, buformin and N-[amino(imino)methyl]- piperidine-1-carboximidamide) are shown. We speculate that amino groups of phenformin are not involved in the darkening activity in contrast to the phenyl group.

**Supplemental Figure 5. Preparation of phenformin-immobilized FG-beads.**

The reaction scheme shows the immobilization of phenformin on magnetic FG-beads. The experimental procedure is described in “Materials and Methods”.

↑  
Supplemental Figure 1  
Takano *et al.*

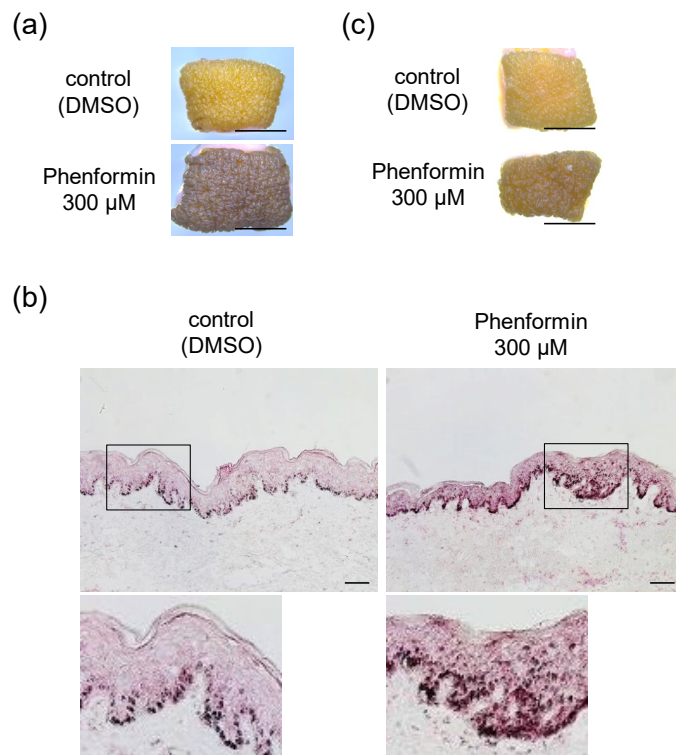

↑  
Supplemental Figure 2  
Takano *et al.*

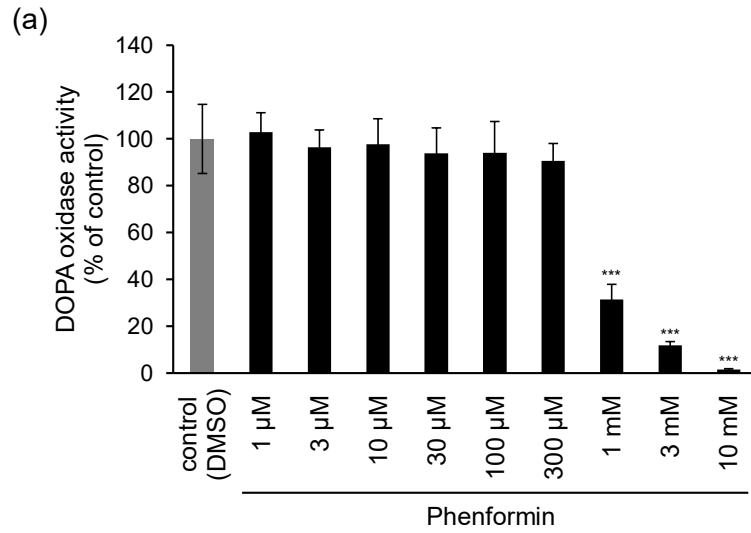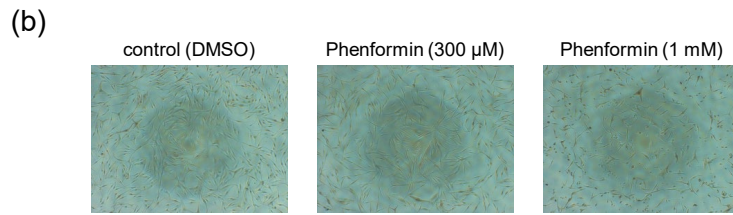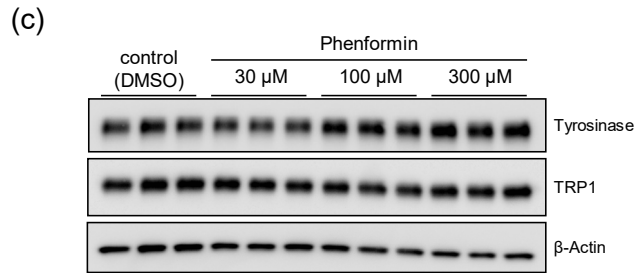

↑  
Supplemental Figure 3  
Takano *et al.*

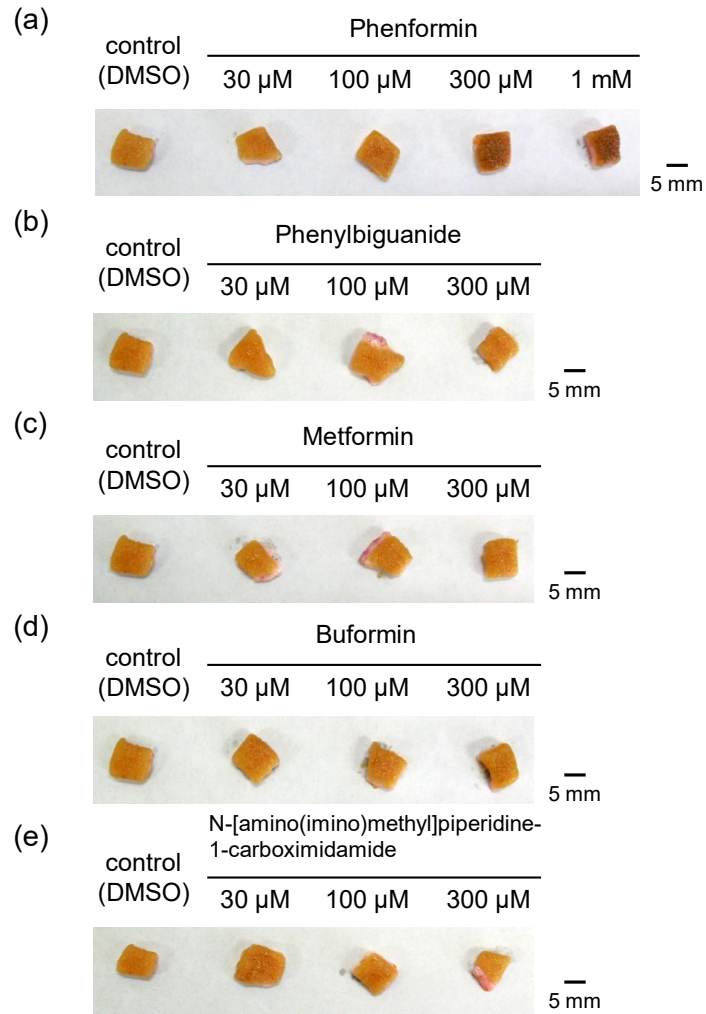

↑  
Supplemental Figure 4  
Takano *et al.*

(a) Skin darkening compound

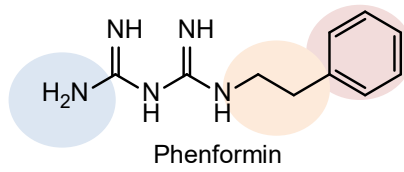

(b) non-skin darkening compounds

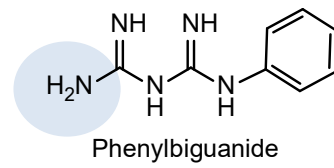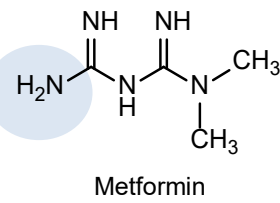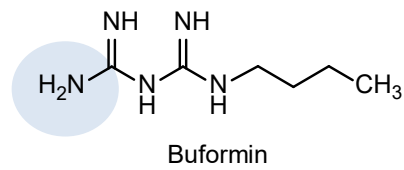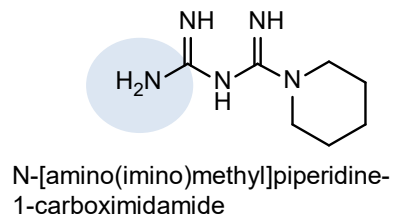

↑  
Supplemental Figure 5  
Takano *et al.*

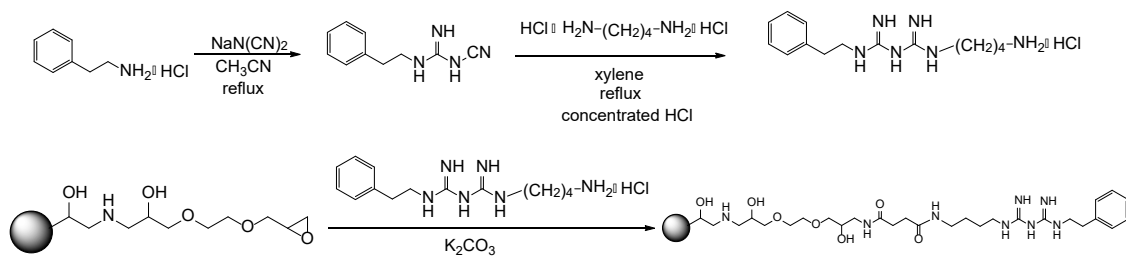

Supplement: ijms-21-01451-s001.pdf [file ijms-21-01451-s001.pdf]
